# Supplementary material for: Significant differences of NH3-SCR performances between monoclinic and hexagonal WO3 on Ce-based catalysts
Source: Royal Society of Chemistry journal article supplement (doi:10.1039/d1en00519g), 2021-01-01
Supplement: d1en00519g1.pdf [file d1en00519g1.pdf]

## Supplementary Information

# Significant differences of NH<sub>3</sub>-SCR performances between monoclinic and hexagonal WO<sub>3</sub> on Ce- based catalyst

Shuang Liu,<sup>a</sup> Pan Yao,<sup>a</sup> Ming-Ming Pei,<sup>b</sup> Qing-Jin Lin,<sup>c</sup> Shu-Hao Xu,<sup>b</sup> Jian-Li Wang,<sup>bd</sup> Hai-Di Xu,<sup>\*abd</sup> and Yao-Qiang Chen<sup>abd</sup>

<sup>a</sup> Institute of New Energy and Low-Carbon Technology, Sichuan University, Chengdu 610207, Sichuan, PR China

<sup>b</sup> Sichuan Provincial Environmental Protection Environmental Catalytic Materials Engineering Technology Center, College of Chemistry, Sichuan University, Chengdu 610064, Sichuan, PR China

<sup>c</sup> State Key Laboratory of Polymer Materials Engineering, Polymer Research Institute, Sichuan University, Chengdu 610064, Sichuan, PR China

<sup>d</sup> Sichuan University FGD (Flue Gas Desulfurization) State Engineering Research Center, Chengdu 610064, Sichuan, PR China

\* Corresponding author, Tel.: +86-28-85418451; Fax.: +86-28-85418451.

\* E-mail: xuhaidi@scu.edu.cn.

Postal address: Institute of New Energy and Low-Carbon Technology, Sichuan University,  
Chuanda Road 2, Chengdu 610207, Sichuan, China.

## **Experimental section**

### **The Preparation of WO<sub>3</sub>**

3 g H<sub>40</sub>N<sub>10</sub>W<sub>12</sub>O<sub>41</sub>·xH<sub>2</sub>O (AR grade, Anda China) was dissolved in 80 mL aqueous solution. The solution was adjusted to pH = 1 by dropwise addition of 0.60 mol/L H<sub>2</sub>SO<sub>4</sub> (AR grade, Kelong China) with constant magnetic stirring at 30 °C for 1 h. Then, the solution was transferred into a Teflon-lined 100 mL autoclave for a hydrothermal treatment at 120 °C for 20 h. After being cooled down to room temperature, the precipitates were filtrated and washed thoroughly with water, followed by drying at 90 °C for 12 h and calcination at 400 °C for 3 h. The hexagonal WO<sub>3</sub> was obtained.

2 g Na<sub>2</sub>WO<sub>4</sub> (AR grade, Kelong China) was dissolved in 80 mL aqueous solution. The 5 mL conc. HCl (AR grade, Kelong China) and 0.91 g (AR grade, Kelong China) oxalic acid were added to the solution successively with constant magnetic stirring at 30 °C for 1 h. Then, the solution was transferred into a Teflon-lined 100 mL autoclave for a hydrothermal treatment at 200 °C for 12 h. After being cooled down to room temperature, the precipitates were filtrated and washed thoroughly with water, followed by drying at 90 °C for 12 h and calcination at 400 °C for 3 h. The monoclinic WO<sub>3</sub> is obtained.

The powders of hexagonal and monoclinic WO<sub>3</sub> were coated on honeycomb cordierites (2.5 mL, 400 cpi, Corning Ltd., USA) with the catalyst loading about 160 g/L. Pure WO<sub>3</sub> monolithic catalysts were obtained after calcining for 3 h at 400 °C and marked as W-h and W-m, respectively. W-h and W-m catalysts were collectively referred to as W.

### **The Preparation of Catalysts**

CeO<sub>2</sub>-WO<sub>3</sub>-hexagonal and CeO<sub>2</sub>-WO<sub>3</sub>-monoclinic catalysts were prepared by mechanical mixing of CeO<sub>2</sub> (Sinocat, China) and hexagonal or monoclinic WO<sub>3</sub> with a molar ratio of 3:1, pure CeO<sub>2</sub>

was used as reference sample. The three cases were dried at 90 °C for 12 h and calcined at 400 °C for 3 h to obtain catalysts powder. The powders were coated on honeycomb cordierites (2.5 mL, 400 cpi, Corning Ltd., USA) with the catalyst loading about 160 g/L. Monolithic catalysts were obtained after calcining for 3 h at 400 °C. The CeO<sub>2</sub>-WO<sub>3</sub>-hexagonal, CeO<sub>2</sub>-WO<sub>3</sub>-monoclinic and CeO<sub>2</sub> catalysts were labeled as Ce-W-h, Ce-W-m and Ce, respectively. Ce-W-h and Ce-W-m catalysts were collectively referred to as Ce-W.

### **NH<sub>3</sub>-SCR Activity Measurements**

Catalyst activity was evaluated in a fixed-bed quartz tube flow reactor. The gases flow was controlled by mass flowmeter before entering the reactor. The simulated reaction conditions were as follows: 500 ppm NO, 550 ppm NH<sub>3</sub>, 50 ppm SO<sub>2</sub> (when used), 5 vol.% H<sub>2</sub>O (when used), 5 vol.% O<sub>2</sub>, N<sub>2</sub> as balance gas. The gas hourly space velocity (GHSV) was 30,000 h<sup>-1</sup>, corresponding to total flow rate of 1,250 mL/min. The concentrations of N<sub>x</sub>O<sub>y</sub> and NH<sub>3</sub> were monitored by FT-IR in Antaris IGS (Nicolet, USA). The conversion of NO<sub>x</sub> and NH<sub>3</sub> as well as the N<sub>2</sub> selectivity were calculated according to the following formula:

$$\text{NO}_x \text{ Conversion (\%)} = \frac{[\text{NO}_x]_{\text{inlet}} - [\text{NO}_x]_{\text{outlet}}}{[\text{NO}_x]_{\text{inlet}}} \times 100 \quad (1)$$

$$\text{NH}_3 \text{ Conversion (\%)} = \frac{[\text{NH}_3]_{\text{inlet}} - [\text{NH}_3]_{\text{outlet}}}{[\text{NH}_3]_{\text{inlet}}} \times 100 \quad (2)$$

$$\begin{aligned} \text{N}_2 \text{ Selectivity (\%)} = & \frac{[\text{NO}_x]_{\text{inlet}} + [\text{NH}_3]_{\text{inlet}} - [\text{NH}_3]_{\text{outlet}} - [\text{NO}_x]_{\text{outlet}} - 2 \times [\text{N}_2\text{O}]_{\text{outlet}}}{[\text{NO}_x]_{\text{inlet}} \\ & + [\text{NH}_3]_{\text{inlet}} - [\text{NH}_3]_{\text{outlet}} - [\text{NO}_x]_{\text{outlet}}} \times 100 \quad (3) \end{aligned}$$

$$\text{NO}_x = \text{NO} + \text{NO}_2 \quad (4)$$

### **Catalysts Characterization**

Powder X-ray diffraction (XRD) experiments were performed on a Rigaku DX-2500 diffractometer (Rigaku, Japan) using Cu Ka ( $\lambda = 0.15406$  nm) radiation. The tube voltage and

current were 40 kV and 25 mA, respectively. XRD powder diffractograms were recorded at  $0.031^{\circ}\cdot\text{s}^{-1}$  intervals in the  $2\theta$  range of  $10\text{--}80^{\circ}$ .

The Vis-Raman spectra of the catalysts were recorded on a LabRAM HR Laser Raman spectrometer (HORIBA JOBIN YVON, France). A diode pumped YAG laser of 532 nm excitation wavelength with power 73.5 mW is employed.

The  $\text{N}_2$  adsorption-desorption was measured on a Quadosorb SI automated surface area and pore size analyzer (Quantachrome, USA) at 77 K, and the sample was pre-treated at  $300^{\circ}\text{C}$  for 3 h prior to the measurement. The surface areas of the catalysts were calculated by the Brunauer-Emmett-Teller.

Transmission electron microscopy (TEM) and TEM-Mapping images were obtained by a Titan G2 60-300 (AC-TEM) with 300 kV accelerating voltage (FEI Co., USA,) to observe the microstructure of samples.

The X-ray photoelectron spectra (XPS) data were recorded by the Escalab 250Xi (Thermo, American) spectrometer with 15 kV high pressure and 20 mA operating current using  $\text{Mg K}_{\alpha}$  radiation. C 1s (284.5 eV) was used for the internal standard to calibrate the binding energy.

Temperature programmed reduction with  $\text{H}_2$  ( $\text{H}_2$ -TPR) experiment was carried out on a TP-5076 TPD/TPR dynamic adsorber (Xianquan, China) with a thermal conductivity detector. The samples approximately 100 mg were pre-treated in a quartz tubular microreactor in a flow of pure  $\text{N}_2$  at  $400^{\circ}\text{C}$  for 40 min, and then cooled to  $30^{\circ}\text{C}$ . The reduction was carried out in a flow of 5 vol.%  $\text{H}_2$ -95%  $\text{N}_2$  from  $30^{\circ}\text{C}$  to  $850^{\circ}\text{C}$  with a heating rate of  $10^{\circ}\text{C}/\text{min}$ . In addition, the  $\text{H}_2$  consumption of catalysts is calculated by the integral fitting after deconvolution (CuO acts as the standard sample).

NO oxidation of monolithic catalyst was evaluated in a fixed-bed quartz tube flow reactor. The simulated reaction conditions were as follows: 500 ppm NO, 5 vol.% O<sub>2</sub>, N<sub>2</sub> as balance gas. The gas hourly space velocity (GHSV) was 30,000 h<sup>-1</sup>. The concentrations of N<sub>x</sub>O<sub>y</sub> were monitored by FT-IR in Antaris IGS (Nicolet, USA). The conversion of NO oxidation was calculated according to the following formula:

$$\text{NO Conversion (\%)} = \frac{[\text{NO}]_{\text{inlet}} - [\text{NO}]_{\text{outlet}}}{[\text{NO}]_{\text{inlet}}} \times 100 \quad (5)$$

Temperature-programmed desorption experiments of NH<sub>3</sub> (NH<sub>3</sub>-TPD) experiments were carried out on a TP-5076 TPD/TPR dynamic adsorber (Xianquan, China) with a thermal conductivity detector. All samples mass about 80 mg in a quartz tubular micro-reactor were used. The experiment included four stages: (1) activate the samples in He at 400 °C for 40 min, (2) adsorption of 2 vol.% NH<sub>3</sub>-98% N<sub>2</sub> at 80 °C for 40 min, (3) isothermal desorption in He at 80 °C until no NH<sub>3</sub> was detected, and (4) temperature programmed desorption in He (TPD stage) at 10 °C/min up to 700 °C.

*In situ* IR Spectra were performed using a Nicolet Nexus 6700 FTIR spectrometer (Nicolet, USA) with a diffuse reflectance infrared fourier transform spectroscopy (DRIFTS) equipped a reaction cell with KBr window. The reaction temperature was controlled by the Omega program temperature controller, heating rate of 10 °C/min. The powder sample was activated in N<sub>2</sub> at 400 °C for 40 min. The background spectra of the sample were recorded in pure N<sub>2</sub> from 350 to 50 °C. And then exposed to NH<sub>3</sub> (N<sub>x</sub>O<sub>y</sub>) for 40 min, the NH<sub>3</sub> (N<sub>x</sub>O<sub>y</sub>) adsorption spectra at 50 to 350 °C of catalysts were collected in pure N<sub>2</sub>. In addition, transient reactions were studied using the same Nicolet Nexus 6700 FTIR spectrometer (Nicolet, USA). The powder sample was pre-treated in N<sub>2</sub> at 400 °C for 40 min prior. The background spectrum of the sample was recorded in pure N<sub>2</sub> at 250-350 °C. And then exposed to NH<sub>3</sub> (N<sub>x</sub>O<sub>y</sub>) for 40 min, and subsequently purged

with N<sub>2</sub> for 20 min. The NH<sub>3</sub> (N<sub>x</sub>O<sub>y</sub>) adsorption spectra at 250-350 °C of samples were recorded in pure N<sub>2</sub>. Afterwards, the spectra were collected when N<sub>x</sub>O<sub>y</sub> (NH<sub>3</sub>) was flowed into the gas chamber to react with the pre-adsorbed NH<sub>3</sub> (N<sub>x</sub>O<sub>y</sub>) species on samples for 1 h. All spectra were recorded by accumulating 64 scans with a resolution of 4 cm<sup>-1</sup>. The gas used for the experiments was a mixture of 1000 ppm NH<sub>3</sub>, 1000 ppm NO, 5 vol.% O<sub>2</sub> and N<sub>2</sub> as the balance gas, with a total flow rate of 300 mL/min.

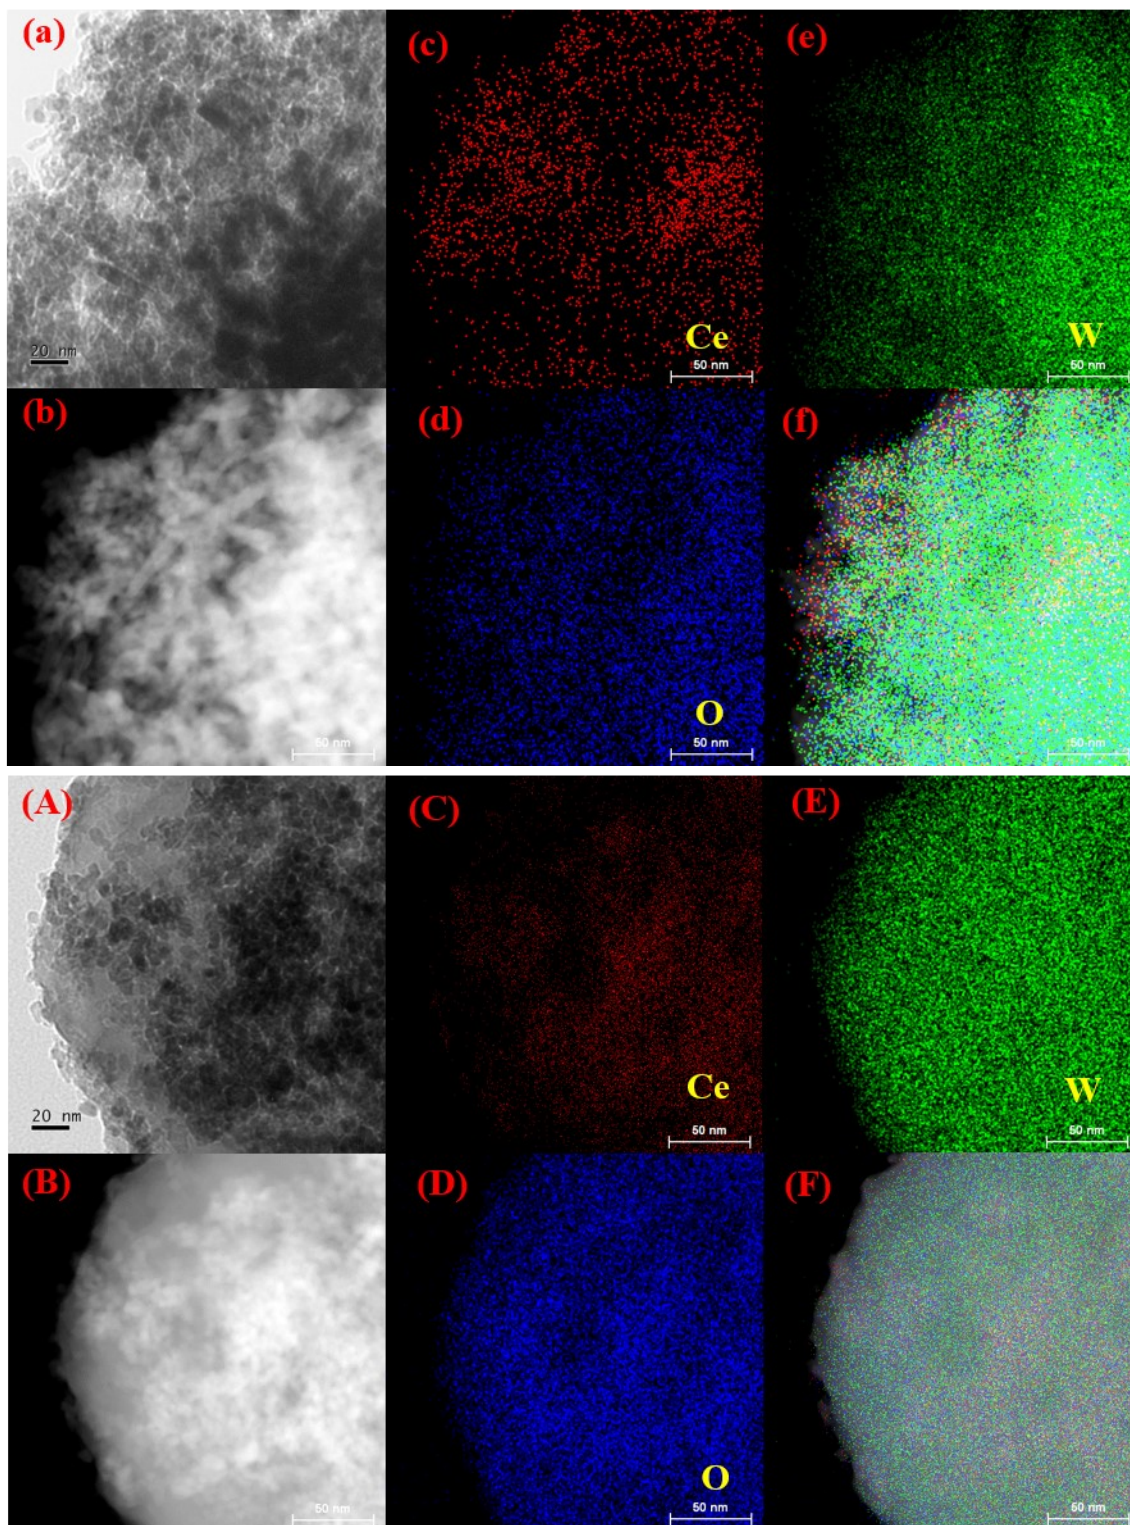

**Fig. S1** TEM of Ce-W-h (a) and Ce-W-m (A) as well as Mapping images of Ce-W-h (b-f) and Ce-W-m (B-F).



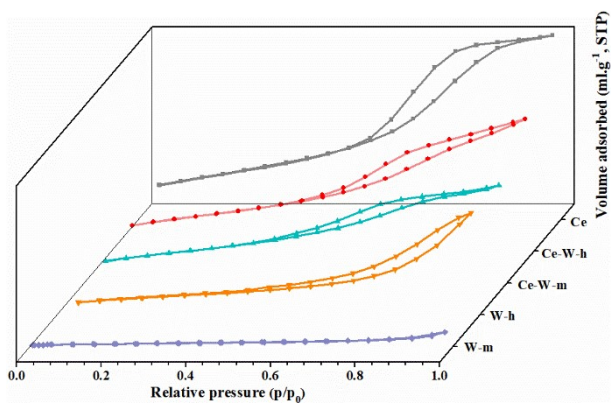

**Fig. S2**  $\text{N}_2$  adsorption-desorption isotherms and specific surface area of pure W and Ce-W catalysts.

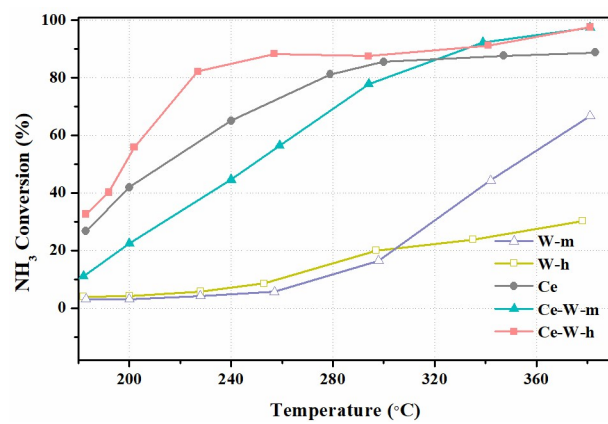

**Fig. S3** NH<sub>3</sub> conversion of the catalysts during NH<sub>3</sub>-SCR reaction.

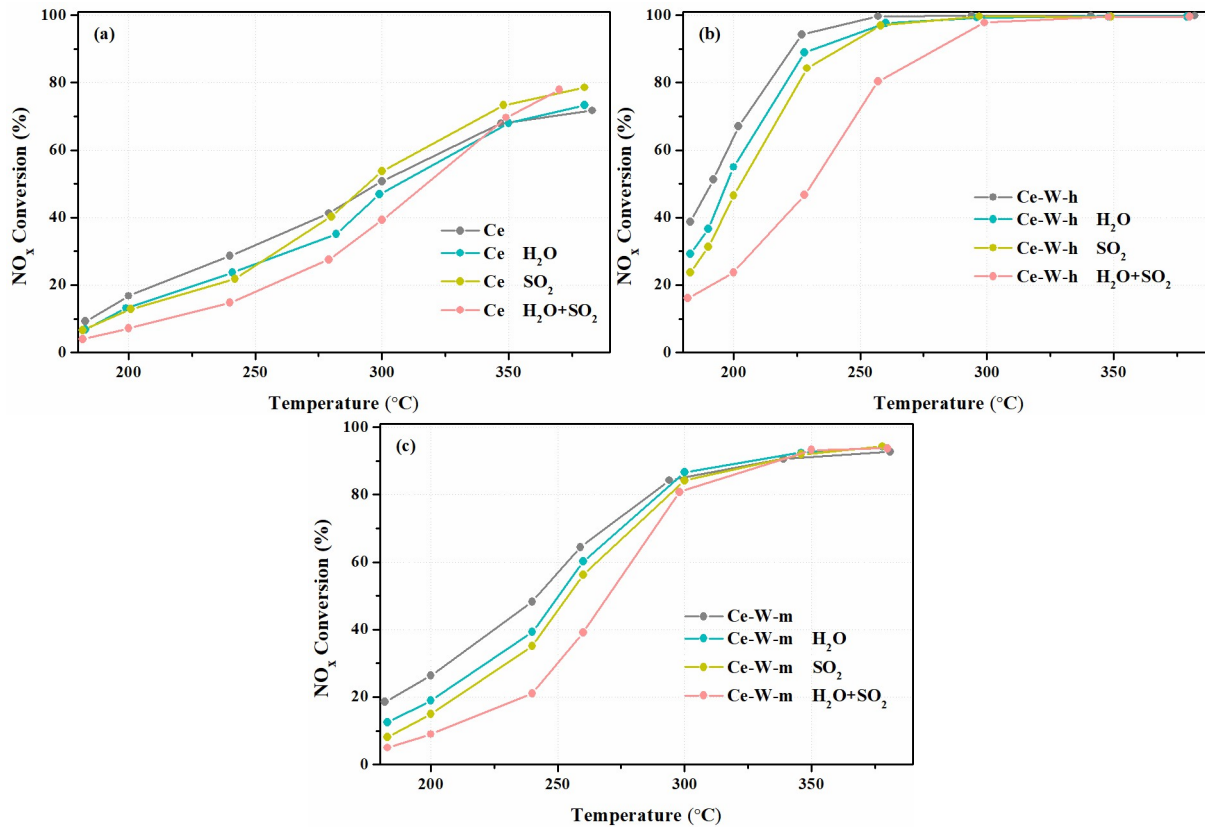

**Fig. S4** NO<sub>x</sub> conversion during NH<sub>3</sub>-SCR reaction in the presence or absence of SO<sub>2</sub> and H<sub>2</sub>O over the Ce (a), Ce-W-h (b) and Ce-W-m (c). Reaction conditions: 500 ppm NO, 550 ppm NH<sub>3</sub>, 5 vol.% O<sub>2</sub>, 50 ppm SO<sub>2</sub> (when used), 5 vol.% H<sub>2</sub>O (when used), balance gas N<sub>2</sub>, GHSV: 30,000 h<sup>-1</sup>.

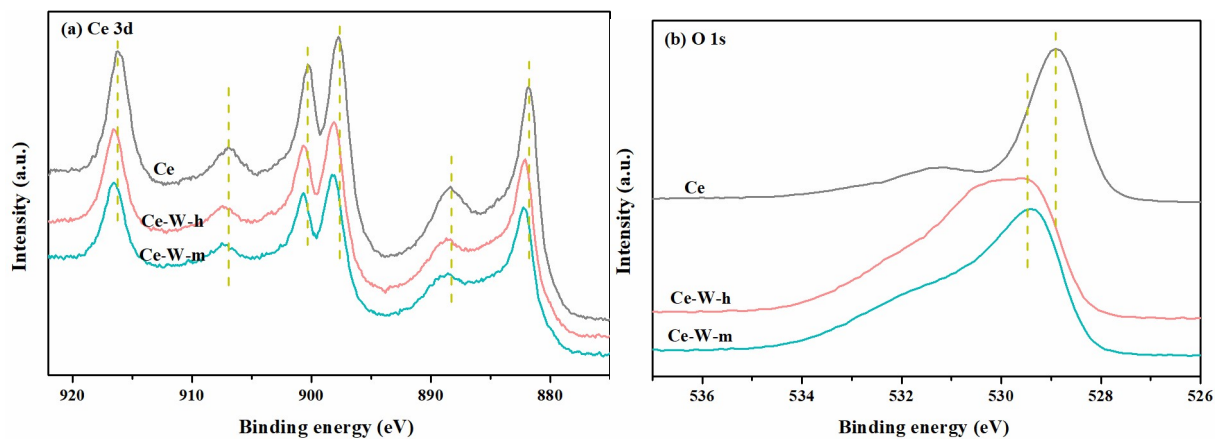

**Fig. S5** The Ce 3d (a) and O 1s (b) XPS spectra of the catalysts.

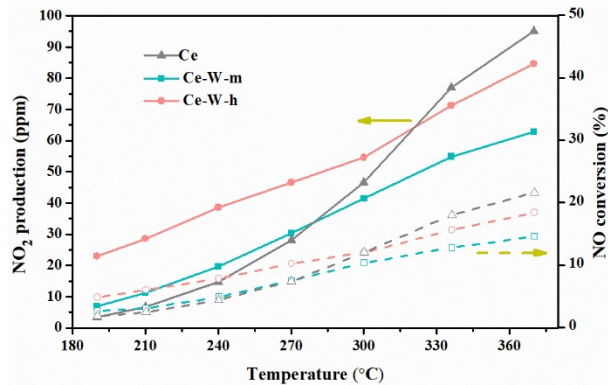

**Fig. S6** The conversion of NO oxidation and the concentration of NO<sub>2</sub> generation over the catalysts. Reaction conditions: 500 ppm NO, 5 vol.% O<sub>2</sub>, balance gas N<sub>2</sub>, GHSV: 30,000 h<sup>-1</sup>.

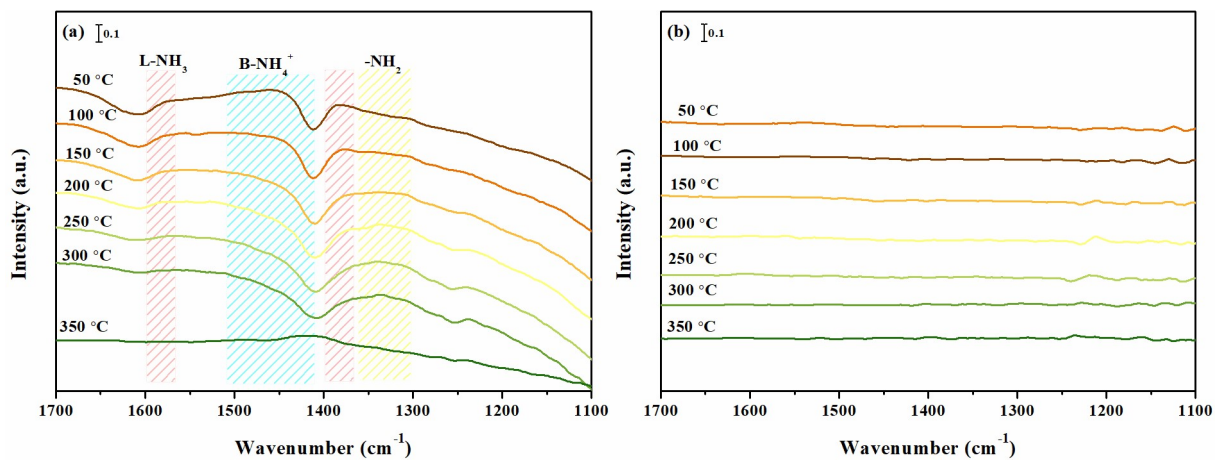

**Fig. S7** DRIFTS spectra of  $\text{NH}_3$  adsorption over W-h (a) and W-m (b) catalysts.

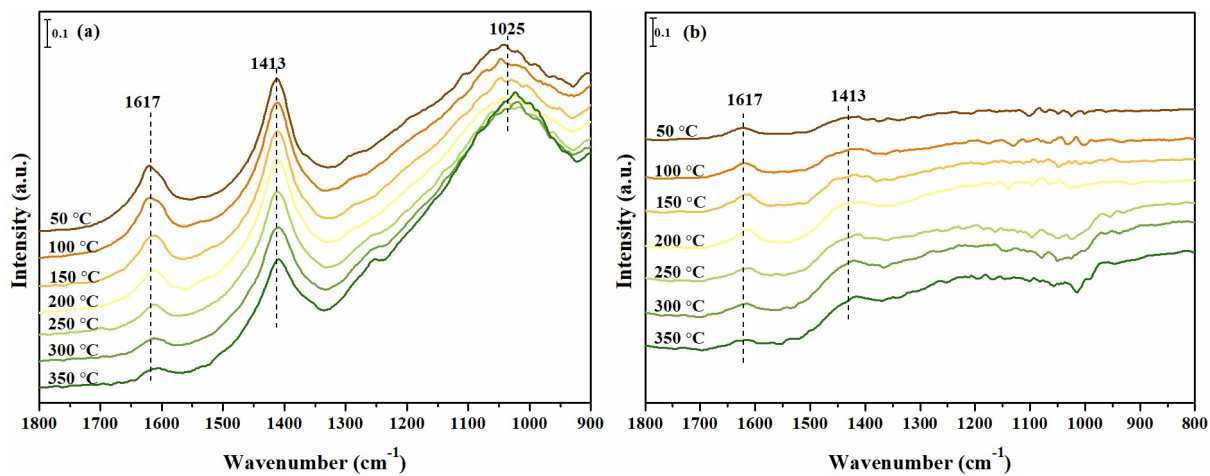

**Fig. S8** DRIFTS spectra of NO+O<sub>2</sub> adsorption over W-h (a) and W-m (b) catalysts.

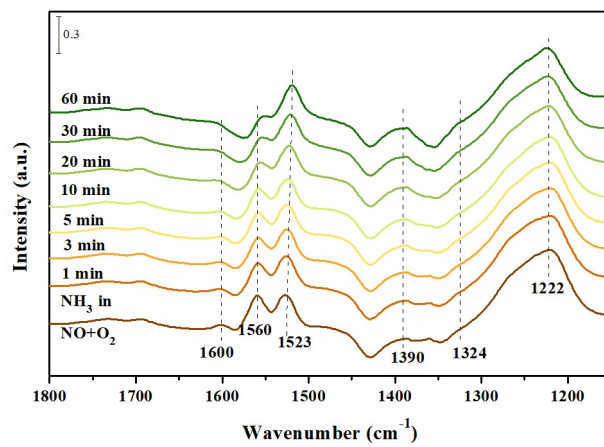

**Fig. S9** *In situ* DRIFTS reaction of NH<sub>3</sub> with pre-adsorbed NO + O<sub>2</sub> over Ce at 300 °C.
